# Supplementary material for: The Role of OmpR in Bile Tolerance and Pathogenesis of Adherent-Invasive Escherichia coli
Source: PubMed Central journal article supplement (PMC8273539; doi:10.3389/fmicb.2021.684473), 2021-06-28
Supplement: Data_Sheet_1.pdf [file Data_Sheet_1.pdf]

## Supplementary material

**Table S1: List of primers**

| Name                                          | Sequence                                                    | Description                         |
|-----------------------------------------------|-------------------------------------------------------------|-------------------------------------|
| <b>Genetic engineering</b>                    |                                                             |                                     |
| <b><i>ompR</i> deletion / complementation</b> |                                                             |                                     |
| oCK647                                        | gaggaattcgagctcggtaccCGGTTTCACGTACTIONCGATAGC               | <i>ompR</i> -up F                   |
| oCK648                                        | tcgcctcatgcccgggGTTTATACTCCCAAAGGTTTCG                      | <i>ompR</i> -up R                   |
| oCK649                                        | aaacccgggCATGAGGCGATTGCGCTTC                                | <i>ompR</i> -down F                 |
| oCK650                                        | ctatcaacaggagtccaagactagtATCCGCCAGTTGCTTAACACC              | <i>ompR</i> -down R                 |
| oCK354                                        | CCGAGCGTTCTGAACAAATC                                        | <i>plasmid integration</i>          |
| oCK576                                        | CATCGGCAGGAGGTTAAGAC                                        | <i>ompR</i> deletion verification F |
| oCK578                                        | ATCAGCAGCGTGCGGTCATC                                        | <i>ompR</i> deletion verification R |
| oVT559                                        | gctcgtaccgggatcctctagaaaggagagaaaATGCAAGAGAACT<br>ACAAGATTC | OmpR complementation F              |
| oVT361                                        | cgcaagcttgatgcctgcagATAAGTCGTCACCAGGCTG                     | OmpR complementation R              |
| <b>qRT-PCR</b>                                |                                                             |                                     |
| oVT614                                        | TGCAGTTTCCAGCTCCAAAC                                        | <i>ompC</i> -F                      |
| oVT615                                        | AGCGTCGTATTTTCAGACCAC                                       | <i>ompC</i> - R                     |
| oVT436                                        | AAAAACGAGCGTGACTGTC                                         | <i>ompF</i> - F                     |
| oVT437                                        | AGCACCAACGATACCAAAGC                                        | <i>ompF</i> R                       |
| oBV97                                         | TGATGCTGGCTGAAAACACC                                        | <i>rpoD</i> - F                     |
| oBV98                                         | TTCAACGGTGCCCATTTAC                                         | <i>rpoD</i> - R                     |
| <b>Sequencing</b>                             |                                                             |                                     |
| oVT357                                        | AGGGGCGTTTTCATCTCGTT                                        | <i>ompR</i> -F                      |
| oVT599                                        | TCGGCAAATCGCGAAGTTC                                         | <i>ompR</i> -R                      |
| oVT1083                                       | GTAAGCTGACGAACCAGGCA                                        | <i>fim</i> -F                       |
| oVT1084                                       | TAATCTCTGGCTCCCGTTGC                                        | <i>fim</i> -F                       |

**Table S2: MIC of standard of care antibiotics against WT and  $\Delta ompR$  AIEC strains**

| Strain |               | MIC ( $\mu\text{g/ml}$ ) |             |                  |            |          |       |            |             |     |     |
|--------|---------------|--------------------------|-------------|------------------|------------|----------|-------|------------|-------------|-----|-----|
|        |               | IPM                      | PMB         | CIP              | MIN        | KAN      | GEN   | AMK        | TOB         | CHL | SPT |
| MG1655 | WT            | 0.0625                   | 0.25        | <0.008           | 1          | 1        | 0.125 | 0.5        | 0.25        | 4   | 8   |
|        | $\Delta ompR$ | 0.031                    | 0.25        | 0.008            | 1          | 1        | 0.125 | 0.5        | 0.125       | 8   | 8   |
| 7136   | WT            | 0.0625                   | 0.25        | 0.008            | 0.5        | 2        | 0.5   | 1          | 0.5         | 4   | 8   |
|        | $\Delta ompR$ | 0.031                    | 0.25        | 0.008            | 0.5        | 2        | 0.25  | 1          | 0.25        | 4   | 8   |
| S136   | WT            | 0.0625                   | 0.25        | 0.016            | 2          | 2        | 0.5   | 1          | <b>1</b>    | 8   | 16  |
|        | $\Delta ompR$ | 0.031                    | 0.25        | 0.008            | 2          | 2        | 0.5   | 1          | <b>0.25</b> | 8   | 16  |
| S179   | WT            | 0.0625                   | 0.25        | 0.008            | 0.5        | 4        | 0.5   | 1          | 0.5         | 8   | 32  |
|        | $\Delta ompR$ | 0.0625                   | 0.25        | 0.008            | 0.5        | 2        | 0.5   | 1          | 0.5         | 8   | 16  |
| S135   | WT            | 0.0625                   | <b>0.25</b> | 0.008            | 0.5        | 2        | 0.5   | 2          | 0.5         | 4   | 8   |
|        | $\Delta ompR$ | 0.031                    | <b>1</b>    | 0.016            | 0.5        | 4        | 0.25  | 1          | 0.5         | 4   | 16  |
| S244   | WT            | 0.0625                   | 0.25        | 0.008            | 0.5        | 2        | 0.5   | 2          | 0.5         | 4   | 16  |
|        | $\Delta ompR$ | 0.031                    | 0.5         | 0.008            | 0.5        | 2        | 0.25  | <b>0.5</b> | 0.25        | 8   | 16  |
| S52    | WT            | 0.125                    | 0.25        | <b>&lt;0.008</b> | 1          | 4        | 1     | 2          | 1           | 4   | 16  |
|        | $\Delta ompR$ | 0.125                    | 0.25        | <b>0.016</b>     | 1          | 4        | 1     | 2          | 1           | 8   | 16  |
| S162   | WT            | 0.031                    | 0.5         | <0.008           | 0.5        | 4        | 0.5   | 1          | 0.5         | 4   | 16  |
|        | $\Delta ompR$ | 0.031                    | 0.5         | 0.008            | 0.5        | 2        | 0.5   | 1          | 0.5         | 8   | 32  |
| LF31   | WT            | 0.0625                   | 0.5         | <0.008           | <b>2</b>   | <b>8</b> | 0.5   | 2          | 0.5         | 4   | 16  |
|        | $\Delta ompR$ | 0.031                    | 0.25        | <0.008           | <b>0.5</b> | <b>2</b> | 0.25  | 1          | 0.25        | 4   | 16  |

IPM: imipenem, PMB: polymyxin B, CIP: ciprofloxacin, MIN: minocycline, KAN: kanamycin, GEN: gentamycin, AMK: amikacin, TOB: tobramycin, CHL: chloramphenicol, SPT: spectinomycin. MIC shifts equal or higher than 4-fold between WT and  $\Delta ompR$  strains are highlighted in bold.

**Table S3: MIC of vancomycin and rifampicin against WT and  $\Delta ompR$  AIEC strains**

| Strain |               | MIC ( $\mu\text{g/ml}$ ) |            |
|--------|---------------|--------------------------|------------|
|        |               | Vancomycin               | Rifampicin |
| MG1655 | WT            | 128                      | 4          |
|        | $\Delta ompR$ | 64                       | 2          |
| 7136   | WT            | 128                      | 4          |
|        | $\Delta ompR$ | 128                      | 4          |
| S136   | WT            | 128                      | 2          |
|        | $\Delta ompR$ | 64                       | 2          |
| S179   | WT            | 128                      | 4          |
|        | $\Delta ompR$ | 64                       | 4          |
| S135   | WT            | <b>&gt;128</b>           | 2          |
|        | $\Delta ompR$ | <b>64</b>                | 2          |
| S244   | WT            | 128                      | 2          |
|        | $\Delta ompR$ | 64                       | 2          |
| S52    | WT            | >128                     | 8          |
|        | $\Delta ompR$ | >128                     | 4          |
| S162   | WT            | 128                      | 4          |
|        | $\Delta ompR$ | 64                       | 2          |
| LF31   | WT            | <b>&gt;128</b>           | 2          |
|        | $\Delta ompR$ | <b>64</b>                | 2          |

MIC shifts equal or higher than 4-fold between WT and  $\Delta ompR$  strains are highlighted in bold.

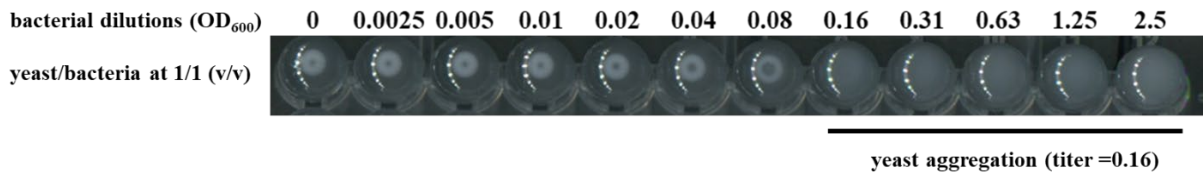

**Figure S1: Example of a yeast aggregation titer assessment.** A fixed amount of yeast cells suspension and decreasing concentrations of bacteria were mixed, and the lowest bacterial dilution still able to form homogenous aggregation was used as read-out. In this example, the yeast aggregation titer is 0.16.

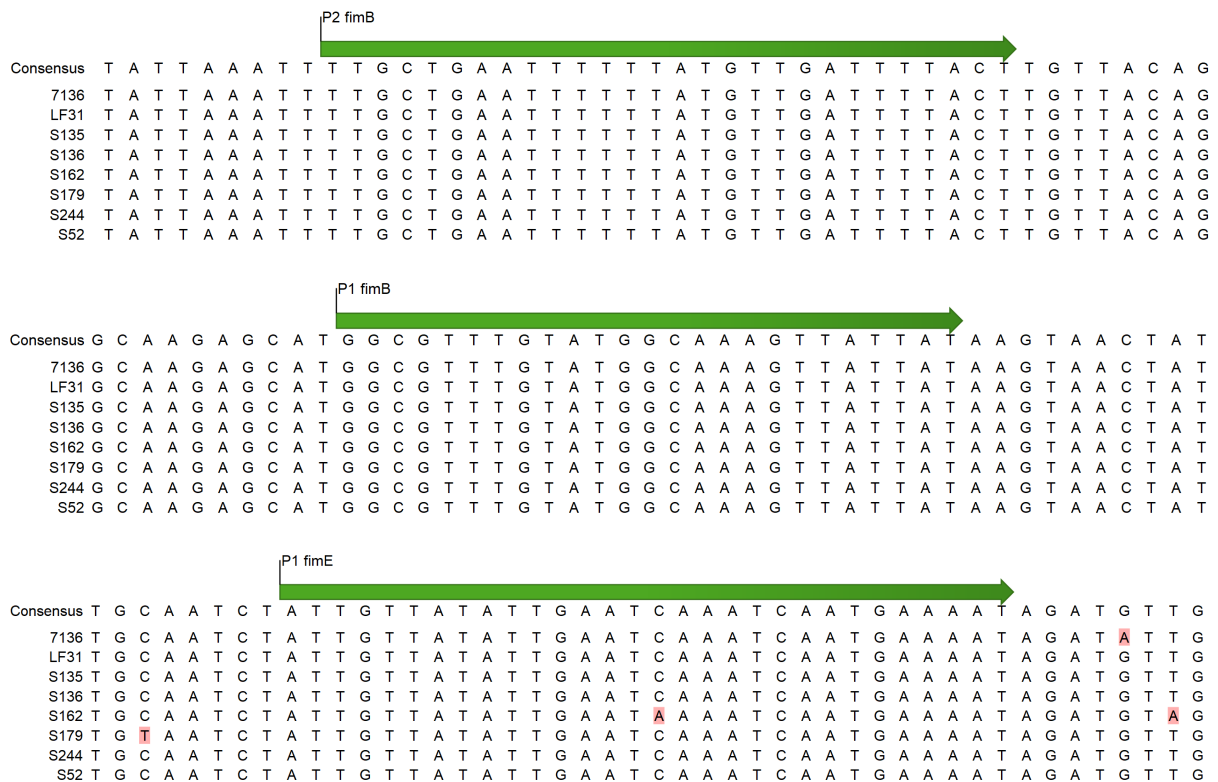

**Figure S2: Sequence of the *fimB* and *fimE* promoters of the 8 AIEC strains.** No mutations were found in the two promoters of *fimB* while the S162 AIEC strain carries a mutation in the *fimE* promoter.

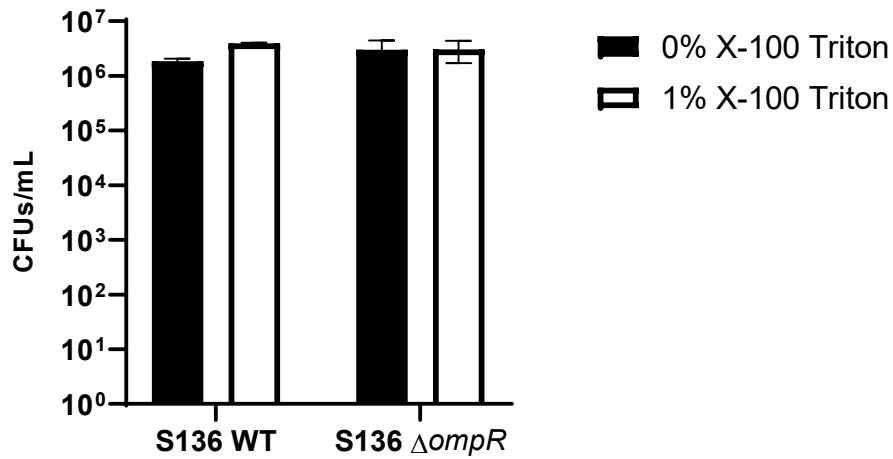

**Figure S3: Effect of X-100 Triton on bacterial cells.** The T84 cell lysis treatment (1% X-100 Triton for 5 min at room temperature) used in the adhesion assay was applied to the AIEC S136 WT and  $\Delta ompR$  mutant to ensure that bacterial cells are not lysed.

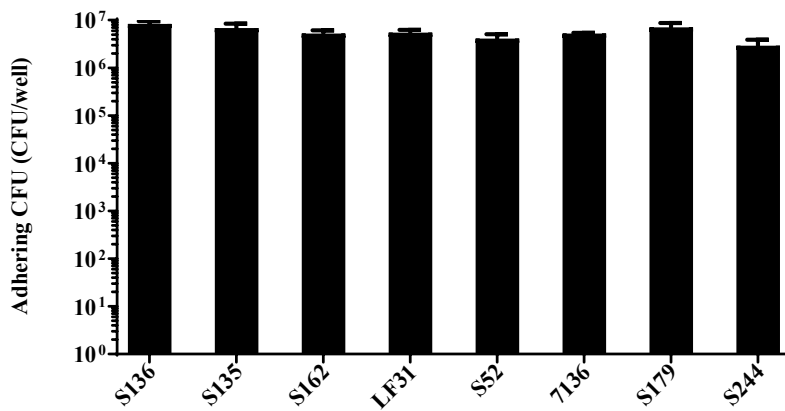

**Figure S4: Adhesion levels of AIEC WT strains to intestinal epithelial cells T84.**

Adhesion assay was performed with T84 intestinal epithelial cells infected with the different WT strains at a MOI of 10 bacteria/cell for 3 hrs. Results are expressed in CFU/well (means  $\pm$  sem, 5 independent experiments).

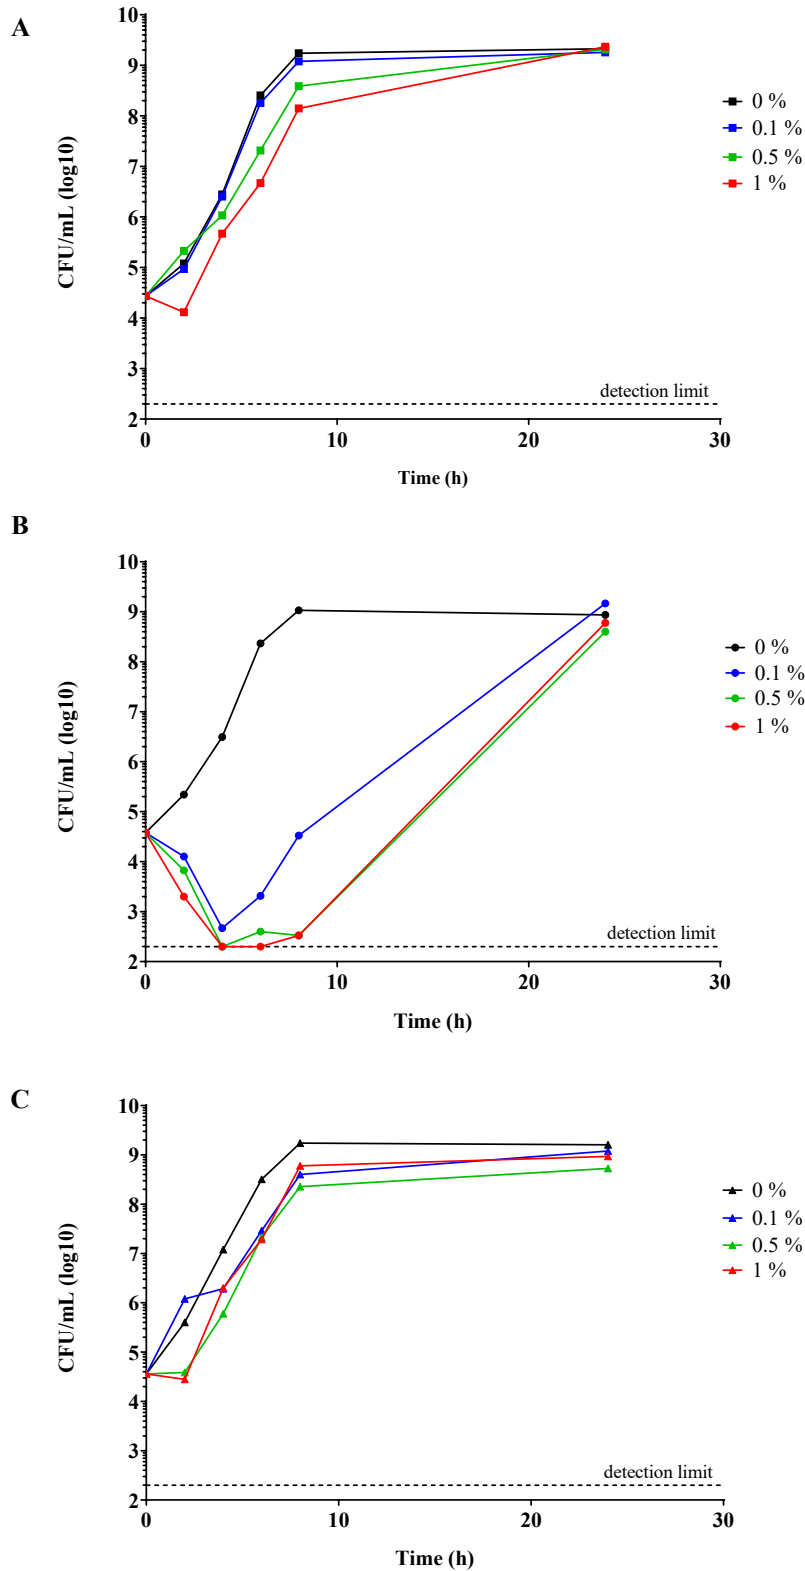

**Figure S5: Growth curve of WT,  $\Delta ompR$  and  $\Delta ompC\Delta ompF$  strains in presence of 0%, 0.1%, 0.5% and 1% of DOC.**

The WT K12 MG1655 *E.coli* strain (A), its  $\Delta ompR$  mutant (B) and  $\Delta ompC\Delta ompF$  (C) were grown in LB supplemented with (black line) 0% DOC, (blue line) 0.1% DOC, (green line) 0.5% DOC and (red line) 1% DOC.

Data representative of at least two independent experiments.

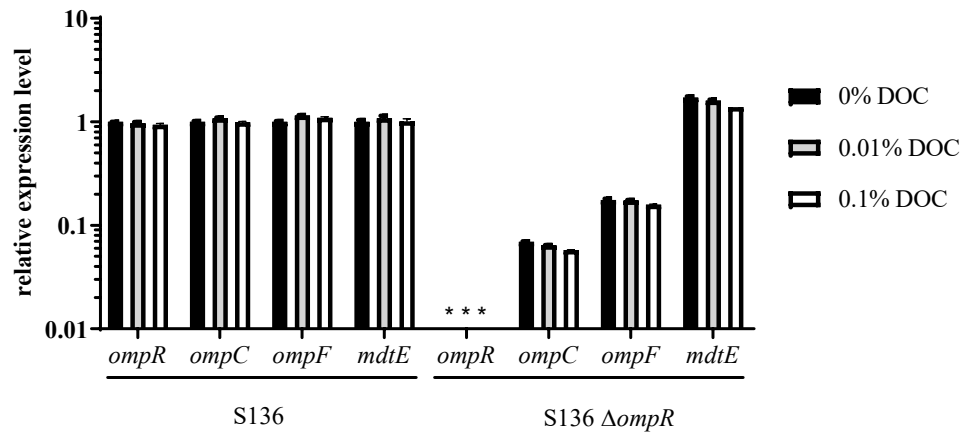

**Figure S6: Influence of deoxycholate on gene expression.**

Expression levels of *ompR*, *ompC*, *ompF* and *mdtE* were quantified by qRT-PCR in WT and  $\Delta ompR$  S136 strains that were grown to mid-log growth phase ( $OD_{600}$  0.4) and incubated with 0% (black), 0.01% (grey) and 0.1% (white) deoxycholate (DOC) for 30 minutes. The expression levels were normalized to the S136 WT strain without DOC (means  $\pm$  sem, 2 technical replicates). \* expression not detected.
